# Supplementary material for: A multifunctional anionic metal–organic framework for high proton conductivity and photoreduction of CO2 induced by cation exchange
Source: Royal Society of Chemistry journal article supplement (doi:10.1039/d2dt00089j), 2022-01-01
Supplement: d2dt00089j1.pdf [file d2dt00089j1.pdf]

## Supporting Information

### **A multifunctional anionic metal-organic framework for high proton-conductivity and photoreduction of CO<sub>2</sub> induced by cation exchange**

Hong-Xu Sun,<sup>a</sup> Hai-Ning Wang,<sup>a</sup> Yao-Mei Fu,<sup>b</sup> Xing Meng,<sup>\*a</sup> Yu-Ou He,<sup>a</sup> Rui-Gang Yang,<sup>a</sup> Zhen Zhou<sup>a</sup> and Zhong-Min Su<sup>b,c</sup>

<sup>a</sup>School of Chemistry and Chemical Engineering, Shandong University of Technology, Zibo, 255049, China. E-mail: [mengxing837@foxmail.com](mailto:mengxing837@foxmail.com).

<sup>b</sup>Shandong Engineering Research Center of Green and High-value Marine Fine Chemical; Weifang University of Science and Technology, Shouguang, 262700, China

<sup>c</sup>School of Chemistry and Environmental Engineering, Changchun University of Science and Technology, Changchun, 130022, China

E-mail: [mengxing837@foxmail.com](mailto:mengxing837@foxmail.com)

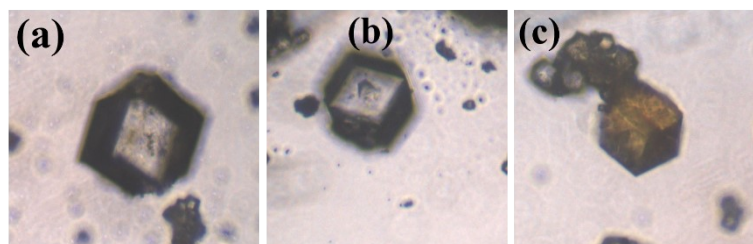

**Fig. S1** Optical micrograph of **In-MOF24** (a), **NH<sub>4</sub><sup>+</sup>@In-MOF24** (b) and **Rubpy@In-MOF24-15** (c).

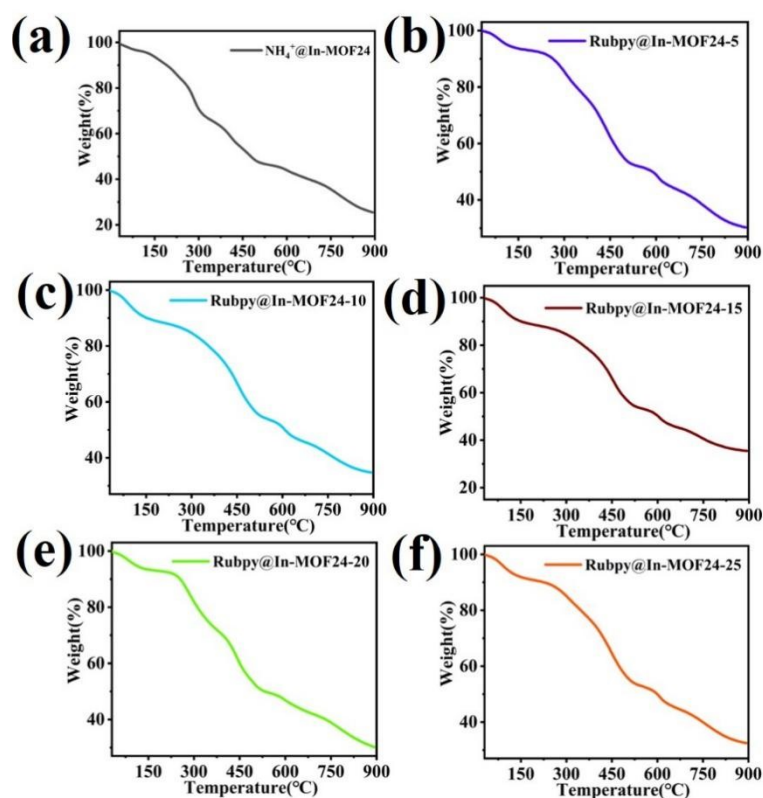

**Fig. S2** TG curve of **NH<sub>4</sub><sup>+</sup>@In-MOF24** (a), **Rubpy@In-MOF24-5** (b), **Rubpy@In-MOF24-10** (c), **Rubpy@In-MOF24-15** (d), **Rubpy@In-MOF24-20** (e) and **Rubpy@In-MOF24-25** (f).

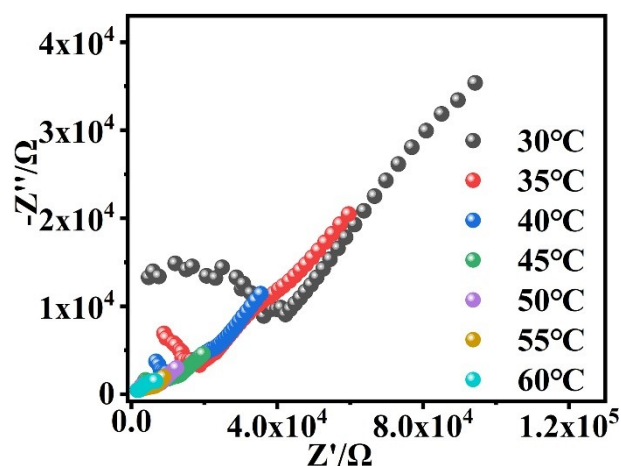

**Fig. S3** Impedance spectra of In-MOF24 at 95%RH with different temperatures.

**Table S1** Proton conductivities of In-MOF24 at 95%RH under different temperatures.

| Temperature<br>(°C) | In-MOF24<br>(S cm <sup>-1</sup> ) |
|---------------------|-----------------------------------|
| 30                  | $4.28 \times 10^{-7}$             |
| 35                  | $1.62 \times 10^{-6}$             |
| 40                  | $3.67 \times 10^{-6}$             |
| 45                  | $9.44 \times 10^{-6}$             |
| 50                  | $2.05 \times 10^{-5}$             |

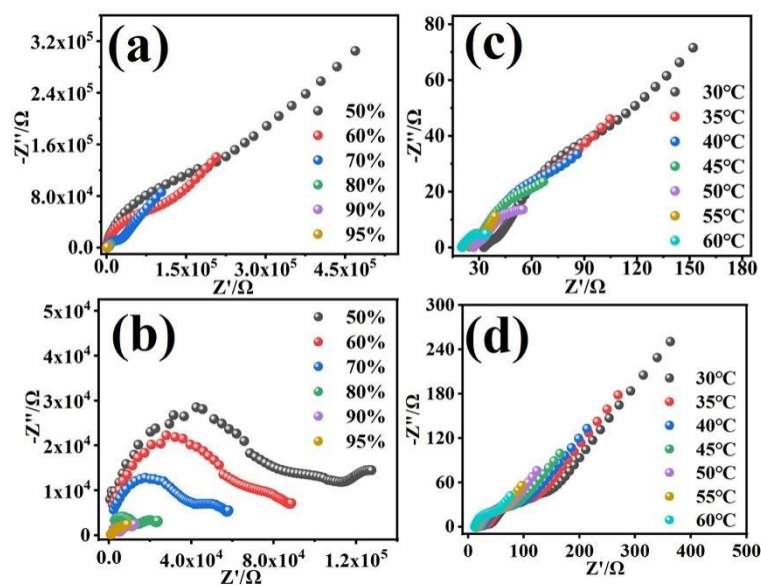

**Fig. S4** Impedance spectra of  $\text{NH}_4^+@$ In-MOF24 (a) and  $\text{Li}^+@$ In-MOF24 (b) at 30°C with different RHs, and  $\text{NH}_4^+@$ In-MOF24 (c) and  $\text{Li}^+@$ In-MOF24 (d) at 95%RH with different temperatures.

**Table S2** Proton conductivities of  $\text{NH}_4^+@$ In-MOF24 and  $\text{Li}^+@$ In-MOF24 at 30°C

under different relative humidity.

| Humidity (% RH) | $\text{NH}_4^+@\text{In-MOF24}$<br>( $\text{S cm}^{-1}$ ) | $\text{Li}^+@\text{In-MOF24}$<br>( $\text{S cm}^{-1}$ ) |
|-----------------|-----------------------------------------------------------|---------------------------------------------------------|
| 50              | $4.27 \times 10^{-7}$                                     | $6.58 \times 10^{-7}$                                   |
| 60              | $8.86 \times 10^{-7}$                                     | $9.17 \times 10^{-7}$                                   |
| 70              | $4.34 \times 10^{-6}$                                     | $1.47 \times 10^{-6}$                                   |
| 80              | $3.19 \times 10^{-5}$                                     | $4.11 \times 10^{-6}$                                   |
| 90              | $1.41 \times 10^{-4}$                                     | $7.65 \times 10^{-6}$                                   |
| 95              | $6.93 \times 10^{-4}$                                     | $3.32 \times 10^{-4}$                                   |

**Table S3** Proton conductivities of  $\text{NH}_4^+@\text{In-MOF24}$  and  $\text{Li}^+@\text{In-MOF24}$  at 95%RH under different temperatures.

| Temperature<br>( $^{\circ}\text{C}$ ) | $\text{NH}_4^+@\text{In-MOF24}$<br>( $\text{S cm}^{-1}$ ) | $\text{Li}^+@\text{In-MOF24}$<br>( $\text{S cm}^{-1}$ ) |
|---------------------------------------|-----------------------------------------------------------|---------------------------------------------------------|
| 30                                    | $6.93 \times 10^{-4}$                                     | $3.32 \times 10^{-4}$                                   |
| 35                                    | $1.05 \times 10^{-3}$                                     | $4.06 \times 10^{-4}$                                   |
| 40                                    | $1.35 \times 10^{-3}$                                     | $4.69 \times 10^{-4}$                                   |
| 45                                    | $2.44 \times 10^{-3}$                                     | $5.30 \times 10^{-4}$                                   |
| 50                                    | $3.64 \times 10^{-3}$                                     | $7.07 \times 10^{-4}$                                   |
| 55                                    | $5.39 \times 10^{-3}$                                     | $8.02 \times 10^{-4}$                                   |
| 60                                    | $9.81 \times 10^{-3}$                                     | $8.72 \times 10^{-4}$                                   |

**Table S4** Proton conductive MOFs and their proton conductivity.

| Materials                                                                                                                                 | Proton conductivity<br>( $\text{S cm}^{-1}$ )                          | Condition                                      | Refs             |
|-------------------------------------------------------------------------------------------------------------------------------------------|------------------------------------------------------------------------|------------------------------------------------|------------------|
| CDs@MOF-802                                                                                                                               | $1.13 \times 10^{-1} \text{ S} \cdot \text{cm}^{-1}$                   | $25^{\circ}\text{C}$ , 98% RH                  | 1                |
| Im@MOF-808                                                                                                                                | $3.45 \times 10^{-2} \text{ S} \cdot \text{cm}^{-1}$                   | $60^{\circ}\text{C}$ , 99% RH                  | 2                |
| $\text{Gd}_2(\text{H}_3\text{nmp})_2 \cdot x\text{H}_2\text{O}$                                                                           | $3.97 \times 10^{-2} \text{ S} \cdot \text{cm}^{-1}$                   | $94^{\circ}\text{C}$ , 98% RH                  | 3                |
| <b><math>\text{NH}_4^+@\text{In-MOF24}</math></b>                                                                                         | <b><math>9.81 \times 10^{-3} \text{ S} \cdot \text{cm}^{-1}</math></b> | <b><math>60^{\circ}\text{C}</math>, 95% RH</b> | <b>This work</b> |
| $\{\text{Na}[\text{Cd}(\text{MIDC})]\}_n$                                                                                                 | $1.04 \times 10^{-3} \text{ S} \cdot \text{cm}^{-1}$                   | $100^{\circ}\text{C}$ , 98% RH                 | 4                |
| $[\text{Cu}_2(\text{DHBDI})_3(\text{SO}_4)_2]_n$                                                                                          | $1.14 \times 10^{-3} \text{ S} \cdot \text{cm}^{-1}$                   | $90^{\circ}\text{C}$ , 98% RH                  | 5                |
| Cd-MOF                                                                                                                                    | $1.15 \times 10^{-3} \text{ S} \cdot \text{cm}^{-1}$                   | $90^{\circ}\text{C}$ , 98% RH                  | 6                |
| MOF-801                                                                                                                                   | $1.88 \times 10^{-3} \text{ S} \cdot \text{cm}^{-1}$                   | $25^{\circ}\text{C}$ , 98% RH                  | 7                |
| Eu(iii)-MOF                                                                                                                               | $3.5 \times 10^{-3} \text{ S} \cdot \text{cm}^{-1}$                    | $80^{\circ}\text{C}$ , 98% RH                  | 8                |
| $(\text{H}[\text{Ln}(\text{H}_2\text{O})_4]_2[\text{MnV}_{13}\text{O}_{38}] \cdot 9\text{NMP} \cdot 17\text{H}_2\text{O})$ (Ln=Ce and La) | $4.68/3.46 \times 10^{-3} \text{ S} \cdot \text{cm}^{-1}$              | $61^{\circ}\text{C}$ , 97% RH                  | 9                |
| UiO-66- $\text{N}_3$                                                                                                                      | $8.8 \times 10^{-3} \text{ S} \cdot \text{cm}^{-1}$                    | $80^{\circ}\text{C}$ , 98% RH                  | 10               |
| MOF-bpy                                                                                                                                   | $1.03 \times 10^{-4} \text{ S} \cdot \text{cm}^{-1}$                   | $60^{\circ}\text{C}$ , 93% RH                  | 11               |
| MOF-Eu                                                                                                                                    | $1.89 \times 10^{-4} \text{ S} \cdot \text{cm}^{-1}$                   | $60^{\circ}\text{C}$ , 98% RH                  | 12               |
| $[\text{CH}_3\text{NH}_3]_2[\text{H}_3\text{O}]\text{Ag}_5\text{Sn}_4\text{Se}_{12} \cdot \text{C}_2\text{H}_5\text{OH}$                  | $2.62 \times 10^{-4} \text{ S} \cdot \text{cm}^{-1}$                   | $60^{\circ}\text{C}$ , 99% RH                  | 13               |
| ZZU-2                                                                                                                                     | $4.63 \times 10^{-4} \text{ S} \cdot \text{cm}^{-1}$                   | $98^{\circ}\text{C}$ , 100% RH                 | 14               |
| Zn-SDC-MOF                                                                                                                                | $8 \times 10^{-4} \text{ S} \cdot \text{cm}^{-1}$                      | $25^{\circ}\text{C}$ , 95% RH                  | 15               |

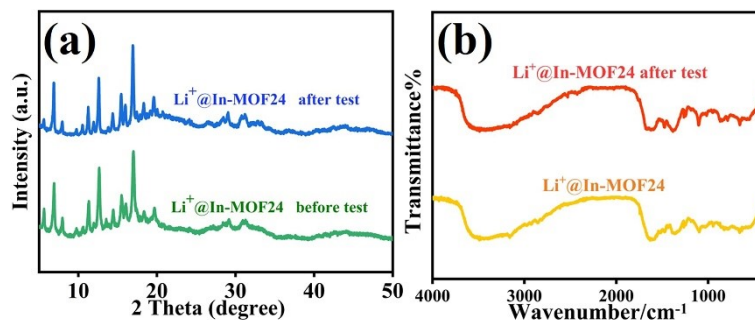

**Fig. S5** The PXRD patterns of the **Li<sup>+</sup>@In-MOF24** before test and after test (a) and the FT-IR spectra of **Li<sup>+</sup>@In-MOF24** before test and after test (b).

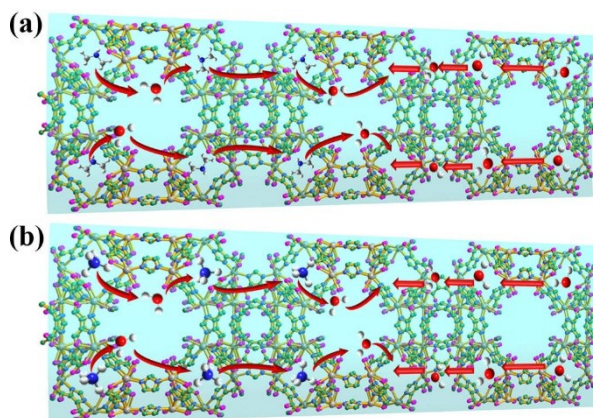

**Fig. S6** The proton conduction pathway of **In-MOF24** (a) and **NH<sub>4</sub><sup>+</sup>@In-MOF24** (b).

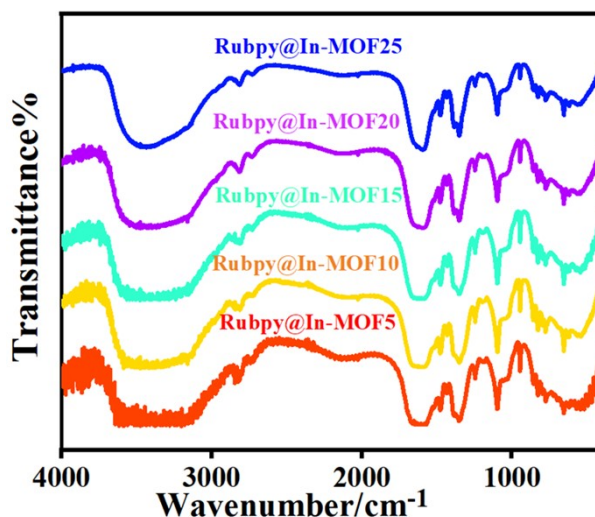

**Fig. S7** FT-IR spectra of **Rubpy@In-MOF24-5**, **Rubpy@In-MOF24-10**, **Rubpy@In-MOF24-15**, **Rubpy@In-MOF24-20** and **Rubpy@In-MOF24-25**.

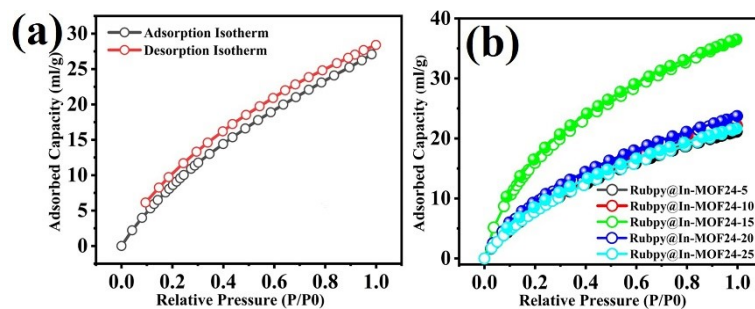

**Fig. S8** CO<sub>2</sub> adsorption-desorption isotherms of **In-MOF24** (a) and **Rubpy@In-MOF24-5**, **Rubpy@In-MOF24-10**, **Rubpy@In-MOF24-15**, **Rubpy@In-MOF24-20** and **Rubpy@In-MOF24-25** at 273K (b).

**Table S5** The Brunauer-Emmett-Teller (BET) specific surface areas of **In-MOF24**, **Rubpy@In-MOF24-5**, **Rubpy@In-MOF24-10**, **Rubpy@In-MOF24-15**, **Rubpy@In-MOF24-20** and **Rubpy@In-MOF24-25**.

| Material                 | CO <sub>2</sub> sorption (ml/g) |
|--------------------------|---------------------------------|
| <b>In-MOF24</b>          | 28.41                           |
| <b>Rubpy@In-MOF24-5</b>  | 21.12                           |
| <b>Rubpy@In-MOF24-10</b> | 22.16                           |
| <b>Rubpy@In-MOF24-15</b> | 36.49                           |
| <b>Rubpy@In-MOF24-20</b> | 23.73                           |
| <b>Rubpy@In-MOF24-25</b> | 21.65                           |

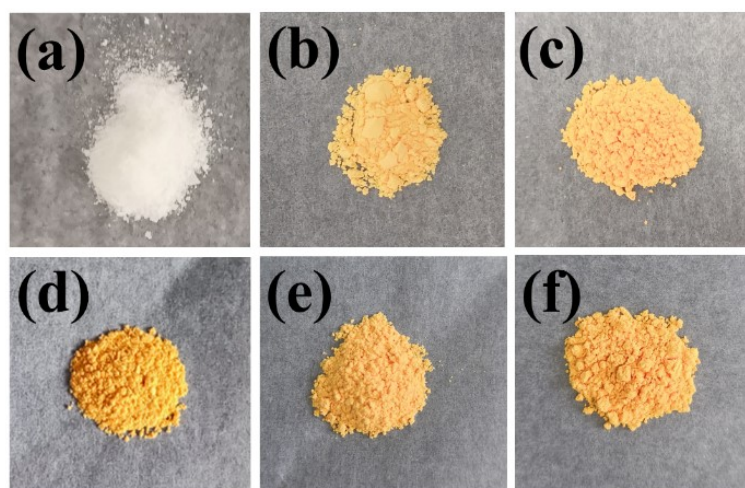

**Fig. S9** Optical picture of **In-MOF24** (a), **Rubpy@In-MOF24-5** (b), **Rubpy@In-MOF24-10** (c), **Rubpy@In-MOF24-15** (d), **Rubpy@In-MOF24-20** (e) and **Rubpy@In-MOF24-25** (f).

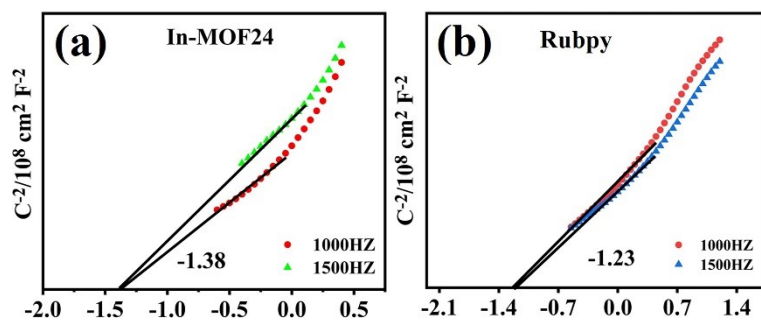

Fig. S10 Mott-Schottky plots of In-MOF24 (a) and Rubpy (b).

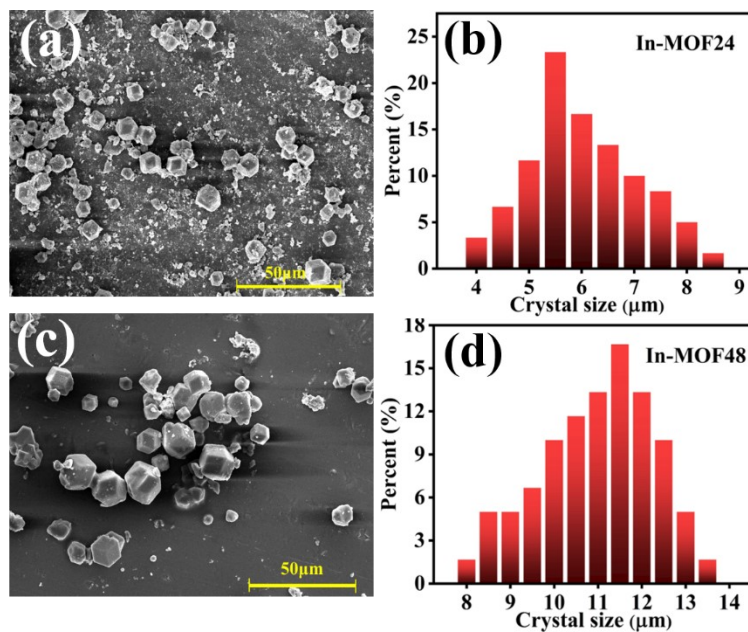

Fig. S11 SEM image of In-MOF24 (a) and In-MOF48 (c), crystal size distribution map of In-MOF24 (b) and In-MOF48 (d).

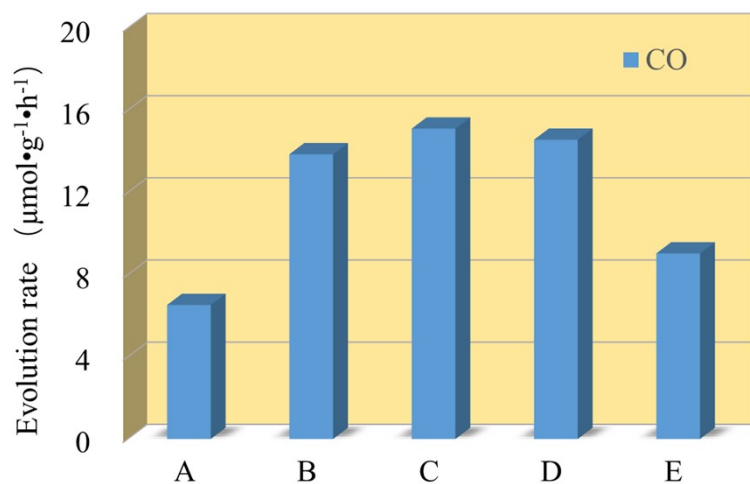

Fig. S12 The efficiencies of Rubpy@In-MOF24-5 (A), Rubpy@In-MOF24-10 (B), Rubpy@In-MOF24-15 (C), Rubpy@In-MOF24-20 (D) and Rubpy@In-MOF24-25 (E) on the evolution of  $\text{CO}_2$  irradiated with visible light for 2h under 10%  $\text{CO}_2$

conditions.

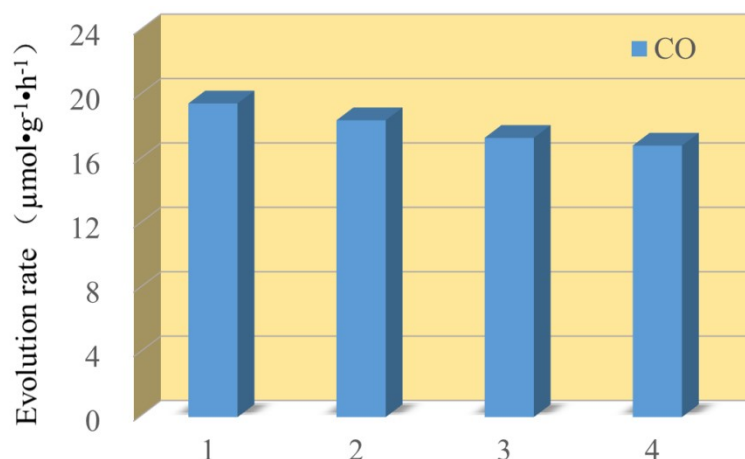

**Fig. S13** The photocatalytic recyclability of **Rubpy@In-MOF24-15**.

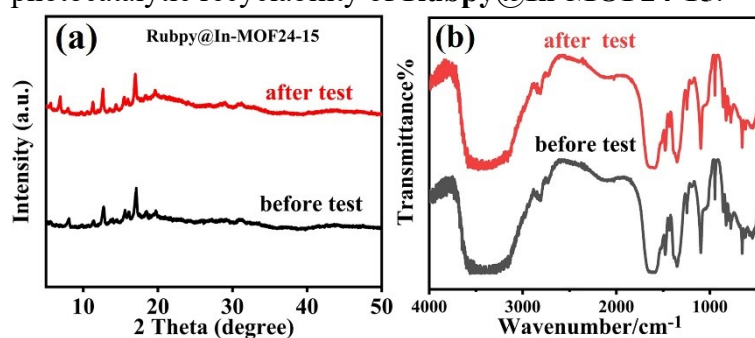

**Fig. S14** The PXRD patterns of the **Rubpy@In-MOF24-15** before test and after test (a) and the FT-IR spectra of **Rubpy@In-MOF24-15** before test and after test (b).

**Table S6** The photocatalytic performances of MOFs with  $\text{H}_2\text{O}$  as sacrificial reagents.

| Materials                                | Products      | Formation rate                                               | Reaction agent                         | Refs             |
|------------------------------------------|---------------|--------------------------------------------------------------|----------------------------------------|------------------|
| <b>Rubpy@In-MOF24-15</b>                 | <b>CO</b>     | <b><math>18.51 \mu\text{mol g}^{-1} \text{h}^{-1}</math></b> | <b><math>\text{H}_2\text{O}</math></b> | <b>This work</b> |
| MOF-Ni                                   | CO            | $371.6 \mu\text{mol g}^{-1} \text{h}^{-1}$                   | $\text{H}_2\text{O}$                   | 18               |
| Mn-MOF                                   | CO            | $21 \mu\text{mol g}^{-1} \text{h}^{-1}$                      | $\text{H}_2\text{O}$                   | 19               |
| UiO-66                                   | CO            | $1.0 \mu\text{mol g}^{-1} \text{h}^{-1}$                     | $\text{H}_2\text{O}$                   | 20               |
| $\text{TiO}_2/\text{ZIF-8-G2}$           | CO            | $21.74 \mu\text{mol g}^{-1} \text{h}^{-1}$                   | $\text{H}_2\text{O}$                   | 21               |
| NNU-31-Zn                                | HCOOH         | $26.3 \mu\text{mol g}^{-1} \text{h}^{-1}$                    | $\text{H}_2\text{O}$                   | 22               |
| $\text{CsPbBr}_3@\text{ZIF-67}$          | $\text{CH}_4$ | $29.63 \mu\text{mol g}^{-1} \text{h}^{-1}$                   | $\text{H}_2\text{O}$                   | 23               |
| $\text{Cu}_3(\text{BTC})_2@\text{TiO}_2$ | $\text{CH}_4$ | $2.64 \mu\text{mol g}^{-1} \text{h}^{-1}$                    | $\text{H}_2\text{O}$                   | 24               |
| $\text{TiO}_2/\text{Co-ZIF-9}$           | CO            | $17.58 \mu\text{mol g}^{-1} \text{h}^{-1}$                   | $\text{H}_2\text{O}$                   | 25               |



|                                                  |    |                                           |                  |    |
|--------------------------------------------------|----|-------------------------------------------|------------------|----|
| Bi <sub>2</sub> S <sub>3</sub> /UiO-66           | CO | 25.6 μmol g <sup>-1</sup> h <sup>-1</sup> | H <sub>2</sub> O | 26 |
| Au@NENU-10                                       | CO | 12.8 μmol g <sup>-1</sup> h <sup>-1</sup> | H <sub>2</sub> O | 27 |
| QS-Co <sub>3</sub> O <sub>4</sub> (ZIF-67)       | CO | 46.3 μmol g <sup>-1</sup> h <sup>-1</sup> | H <sub>2</sub> O | 28 |
| CsPbBr <sub>3</sub> QDs/UiO-66(NH <sub>2</sub> ) | CO | 8.21 μmol g <sup>-1</sup> h <sup>-1</sup> | H <sub>2</sub> O | 29 |
| TiO <sub>2</sub> /CPO-27-Mg                      | CO | 4.09 μmol g <sup>-1</sup> h <sup>-1</sup> | H <sub>2</sub> O | 30 |

## Notes and references

1. J. Zhang, R. Zhang, Y. Y. Liu, Y. R. Kong, H. B. Luo, Y. Zou, L. Zhai and X. M. Ren, Acidic Groups Functionalized Carbon Dots Capping Channels of a Proton Conductive Metal-Organic Framework by Coordination Bonds to Improve the Water-Retention Capacity and Boost Proton Conduction, *ACS Appl. Mater. Interfaces.*, 2021, **13**, 60084-60091.
2. H. B. Luo, Q. Ren, P. Wang, J. Zhang, L. F. Wang and X. M. Ren, High Proton Conductivity Achieved by Encapsulation of Imidazole Molecules into Proton-Conducting MOF-808, *ACS Appl. Mater. Interfaces.*, 2019, **11**, 9164-9171.
3. R. F. Mendes, P. Barbosa, E. M. Domingues, P. Silva, F. Figueiredo and F. A. A. Paz Chem, Enhanced proton conductivity in a layered coordination polymer, *Chem. Sci.*, 2020, **11**, 6305-6311.
4. R. L. Liu, Y. R. Liu, S. H. Yu, C. L. Yang, Z. F. Li and G. Li, A Highly Proton-Conductive 3D Ionic Cadmium-Organic Framework for Ammonia and Amines Impedance Sensing, *ACS Appl. Mat. Interfaces.*, 2019, **11**, 1713-1722.
5. F. Q. Mi, F. X. Ma, S. X. Zou, D. S. Zhan and T. Zhang, A proton-conductive metal-organic framework based on imidazole and sulphate ligands, *Dalton Trans.*, 2022, **51**, 1313-1317.
6. F. D. Wang, W. H. Su, C. X. Zhang and Q. L. Wang, High Proton Conductivity of a Cadmium Metal-Organic Framework Constructed from Pyrazolecarboxylate and Its Hybrid Membrane, *Inorg. Chem.*, 2021, **60**, 16337-16345.
7. J. Zhang, H. J. Bai, Q. Ren, H. B. Luo, X. M. Ren, Z. F. Tian and S. F. Lu, Extra Water- and Acid-Stable MOF-801 with High Proton Conductivity and Its Composite Membrane for Proton Exchange Membrane, *ACS Appl. Mater. Interfaces.*, 2018, **10**, 28656-28663.
8. L. Feng, T. Y. Zeng, H. B. Hou, H. Zhou and J. Tian, Theoretical hydrogen bonding calculations and proton conduction for Eu(iii)-based metal-organic framework, *RSC Adv.*, 2021, **11**, 11495-11499.
9. J. X. Wang, Y. D. Wang, M. J. Wei, H. Q. Tan, Y. H. Wang, H. Y. Zang and Y. G. Li, Inorganic open framework based on lanthanide ions and polyoxometalates with high proton conductivity, *Inorg. Chem. Front.*, 2018, **5**, 1213-1217.
10. X. N. Zou, D. S. Zhang, Y. L. Xie, T. X. Luan, W. C. Li, L. Li and P. Z. Li, High Enhancement in Proton Conductivity by Incorporating Sulfonic Acids into a

- Zirconium-Based Metal-Organic Framework via "Click" Reaction, *Inorg. Chem.*, 2021, **60**, 10089-10094.
11. H. F. Wang, T. Y. Wen, Z. C. Shao, Y. J. Zhao, Y. Cui, K. Gao, W. J. Xu and H. W. Hou, High Proton Conductivity in Nafion/Ni-MOF Composite Membranes Promoted by Ligand Exchange under Ambient Conditions, *Inorg. Chem.*, 2021, **60**, 14, 10492–10501.
  12. F. M. Wang, B. X. Hu, W. P. Lustig, L. Zhou, J. Xiang, L. Z. Chen and J. Li, Three Robust Blue-Emitting Anionic Metal–Organic Frameworks with High Stability and Good Proton Conductivities, *Inorg. Chem.*, 2021, **60**, 17926–17932.
  13. H. B. Luo, Q. Ren, Y. Liu, Proton Conduction of an Acid-Resistant Open-Framework Chalcogenidometalate Hybrid in Anhydrous versus Humid Environments, *Inorg. Chem.*, 2020, **59**, 7283-7289.
  14. R. L. Liu, W. T. Qu, B. H. Dou, Proton-Conductive 3D LnIII Metal-Organic Frameworks for Formic Acid Impedance Sensing, *Chem Asian J.*, 2020, **15**, 182-190.
  15. Y. Son, P. C. Rao, J. Kim, G. Park and M. Yoon, Study of Stability and Proton Conductivity of Zn-based Metal-Organic Framework, *B Kor Chem Soc.*, 2021, **42**, 810-817.
  16. P. Rought, C. Marsh, O. Ilogu, S. Pili, V. G. Sakai, M. Li, M. S. Brown, S. P. Argent, I. V. Yrezabal, G. Whitehead, M. R. Warren, S. Yang and M. Schröder, Modulating proton diffusion and conductivity in metal-organic frameworks by incorporation of accessible free carboxylic acid groups, *Chem. Sci.*, 2019, **10**, 1492-1499.
  17. S. M. Lia, F. Wu, R. B. Lin, J. Wang, C. X. Li, Z. Q. Li, J. Jiang and Y. J. Xiong, Enabling photocatalytic hydrogen production over Fe-based MOFs by refining band structure with dye sensitization, *Chem Eng J.*, 2022, **429**, 132217.
  18. X. K. Wang, J. Liu, L. Zhang, L. Z. Dong, S. L. Li, Y. H. Kan, D. S. Li, and Y. Q. Lan, Monometallic Catalytic Models Hosted in Stable Metal Organic Frameworks for Tunable CO<sub>2</sub> Photoreduction, *ACS Catal.*, 2019, **9**, 1726-1732.
  19. J. H. Qin, P. Xu, Y. D. Huang, L. Y. Xiao, W. W. Lu, X. G. Yang, L. F. Ma and S. Q. Zang, High loading of Mn(II)-metalated porphyrin in a MOF for photocatalytic CO<sub>2</sub> reduction in gas-solid conditions, *Chem. Commun.*, 2021, **57**, 8468-8471.
  20. Y. J. Ma, Q. Tang, W. Y. Sun, Z. Y. Yao, W. H. Zhu, T. Li, J. Y. Wang, Assembling ultrafine TiO<sub>2</sub> nanoparticles on UiO-66 octahedrons to promote selective photocatalytic conversion of CO<sub>2</sub> to CH<sub>4</sub> at a low concentration, *Appl. Catal. B-Environ.*, 2020, **270**, 118856-118891.
  21. Y. H. Zou, H. N. Wang, X. Meng, H. X. Sun and Z. Y. Zhou, Self-assembly of TiO<sub>2</sub>/ZIF-8 nanocomposites for varied photocatalytic CO<sub>2</sub> reduction with H<sub>2</sub>O vapor induced by different synthetic methods, *Nanoscale Adv.*, 2021, **3**, 1455-1463.
  22. L. Z. Dong, L. Zhang, J. Liu, Q. Huang, M. Lu, W. X. Ji and Y. Q. Lan, Stable Heterometallic Cluster-Based Organic Framework Catalysts for Artificial Photosynthesis, *Angew. Chem. Int. Ed.*, 2020, **59**, 2659-2663.

23. S. Wan, M. Ou, Q. Zhong, X. Wang, Perovskite-type CsPbBr<sub>3</sub> quantum dots/UiO-66(NH<sub>2</sub>) nanojunction as efficient visible-light-driven photocatalyst for CO<sub>2</sub> reduction, *Chem. Eng. J.*, 2019, **358**, 1287-1295.
24. C. Zheng, X. Y. Qiu, J. Y. Han, Y. F. Wu, S. Q. Liu, Zero-Dimensional-g-CNQD-Coordinated Two-Dimensional Porphyrin MOF Hybrids for Boosting Photocatalytic CO<sub>2</sub> Reduction, *ACS Appl. Mater. Interfaces.*, 2019, **11**, 42243-42249.
25. S. Yan, S. Ouyang, H. Xu, M. Zhao, X. Zhang, J. Ye, Co-ZIF-9/TiO<sub>2</sub> nanostructure for superior CO<sub>2</sub> photoreduction activity, *J. Mater. Chem. A.*, 2016, **4**, 15126-15133.
26. X. Chen, Q. Li, J. Li, J. Chen, H. Jia, Modulating charge separation via in situ hydrothermal assembly of low content Bi<sub>2</sub>S<sub>3</sub> into UiO-66 for efficient photothermocatalytic CO<sub>2</sub> reduction, *Appl. Catal. B.*, 2020, **270**, 118915.
27. S. M. Liu, Z. Zhang, X. Li, H. Jia, M. Ren, S. Liu, Ti-Substituted Keggin-Type Polyoxotungstate as Proton and Electron Reservoir Encaged into Metal-Organic Framework for Carbon Dioxide Photoreduction, *Adv. Mater. Interfaces.*, 2018, **5**, 1801062.
28. L. Wang, J. Wan, Y. Zhao, N. Yang, D. Wang, Hollow Multi-Shelled Structures of Co<sub>3</sub>O<sub>4</sub> Dodecahedron with Unique Crystal Orientation for Enhanced Photocatalytic CO<sub>2</sub> Reduction, *J. Am. Chem. Soc.*, 2019, **141**, 2238-2241.
29. S. Wan, M. Ou, Q. Zhong, X. Wang, Perovskite-type CsPbBr<sub>3</sub> quantum dots/UiO-66(NH<sub>2</sub>) nanojunction as efficient visible-light-driven photocatalyst for CO<sub>2</sub> reduction, *Chem. Eng. J.*, 2019, **358**, 1287-1295.
30. M. Wang, D. Wang, Z. Li, Self-assembly of CPO-27-Mg/TiO<sub>2</sub> nanocomposite with enhanced performance for photocatalytic CO<sub>2</sub> reduction, *Appl. Catal. B.*, 2016, **183**, 47-52.
